# Supplementary material for: A sensitivity scale for targeting T cells with chimeric antigen receptors (CARs) and bispecific T-cell Engagers (BiTEs)
Source: PubMed Central journal article supplement — Oncoimmunology. 2012 Sep 1;1(6):863–73. doi: 10.4161/onci.20592 (PMC3489742; doi:10.4161/onci.20592), 2012-09-01
Supplement: onci-1-863-s01.pdf [file onci-1-863-s01.pdf]

Supplementary Materials to:

**A sensitivity scale for targeting T cells with Chimeric Antigen Receptors  
(CARs) and Bispecific T cell Engagers (BiTEs)**

Jennifer D. Stone, David H. Aggen, Andrea Schietinger, Hans Schreiber, and David  
M. Kranz

OncoImmunology 2012; 1(8): DOI: 10.4161.20580

<http://www.landesbioscience.com/journals/oncoimmunology/article/20592>

# Supplementary Figure 1

Dako Qifi Kit  
 Mouse IgG2a beads (K0078)  
 Stained with included FITC anti-mouse

| Bead population | # Ab bound per bead |
|-----------------|---------------------|
| A               | 0 (set-up beads)    |
| B               | 1,800               |
| C               | 12,000              |
| D               | 53,000              |
| E               | 185,000             |
| F               | 530,000             |

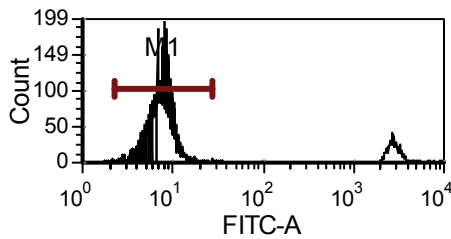

| Marker | Median | Geometric Mean | Arithmetic Mean |
|--------|--------|----------------|-----------------|
| M1     | 7.64   | 7.45           | 7.86            |

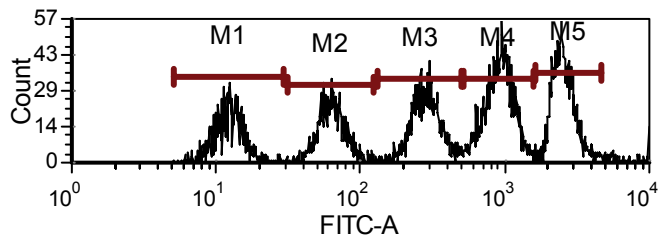

| Marker | Median  | Geometric Mean | Arithmetic Mean |
|--------|---------|----------------|-----------------|
| M1     | 12.41   | 12.34          | 12.75           |
| M2     | 63.21   | 63.52          | 65.22           |
| M3     | 283.87  | 282.63         | 290.51          |
| M4     | 930.57  | 912.76         | 935.62          |
| M5     | 2502.87 | 2563.08        | 2607.71         |

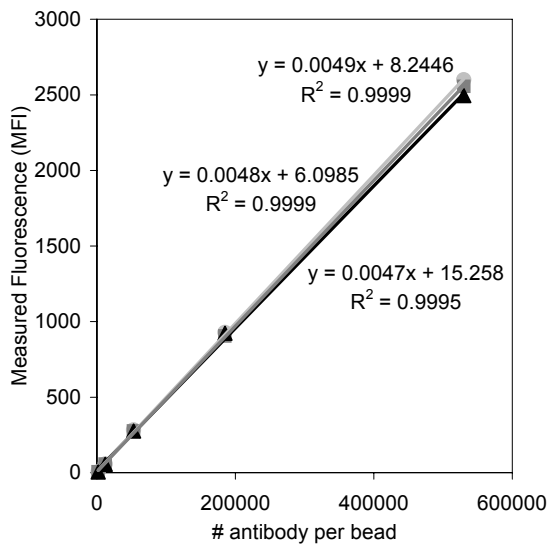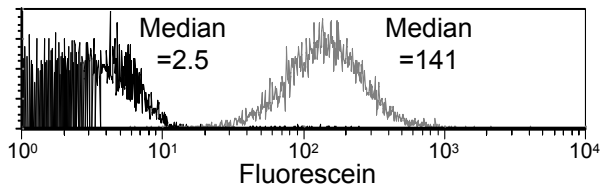

**Average measurements in this experiment: 12,000 ± 1000**

**Average over three independent experiments: 13,600 +/- 2300**

**Supplementary Figure 1. Quantification of Antibodies Bound to Cells By Comparison to Calibrated Beads.** Ag104A and beads with the capacity to bind different levels of murine antibodies (Dako) were stained with saturating levels of 237 antibody, and detection was carried out with a fluorescein-labeled anti-mouse antibody.

## Supplementary Figure 2

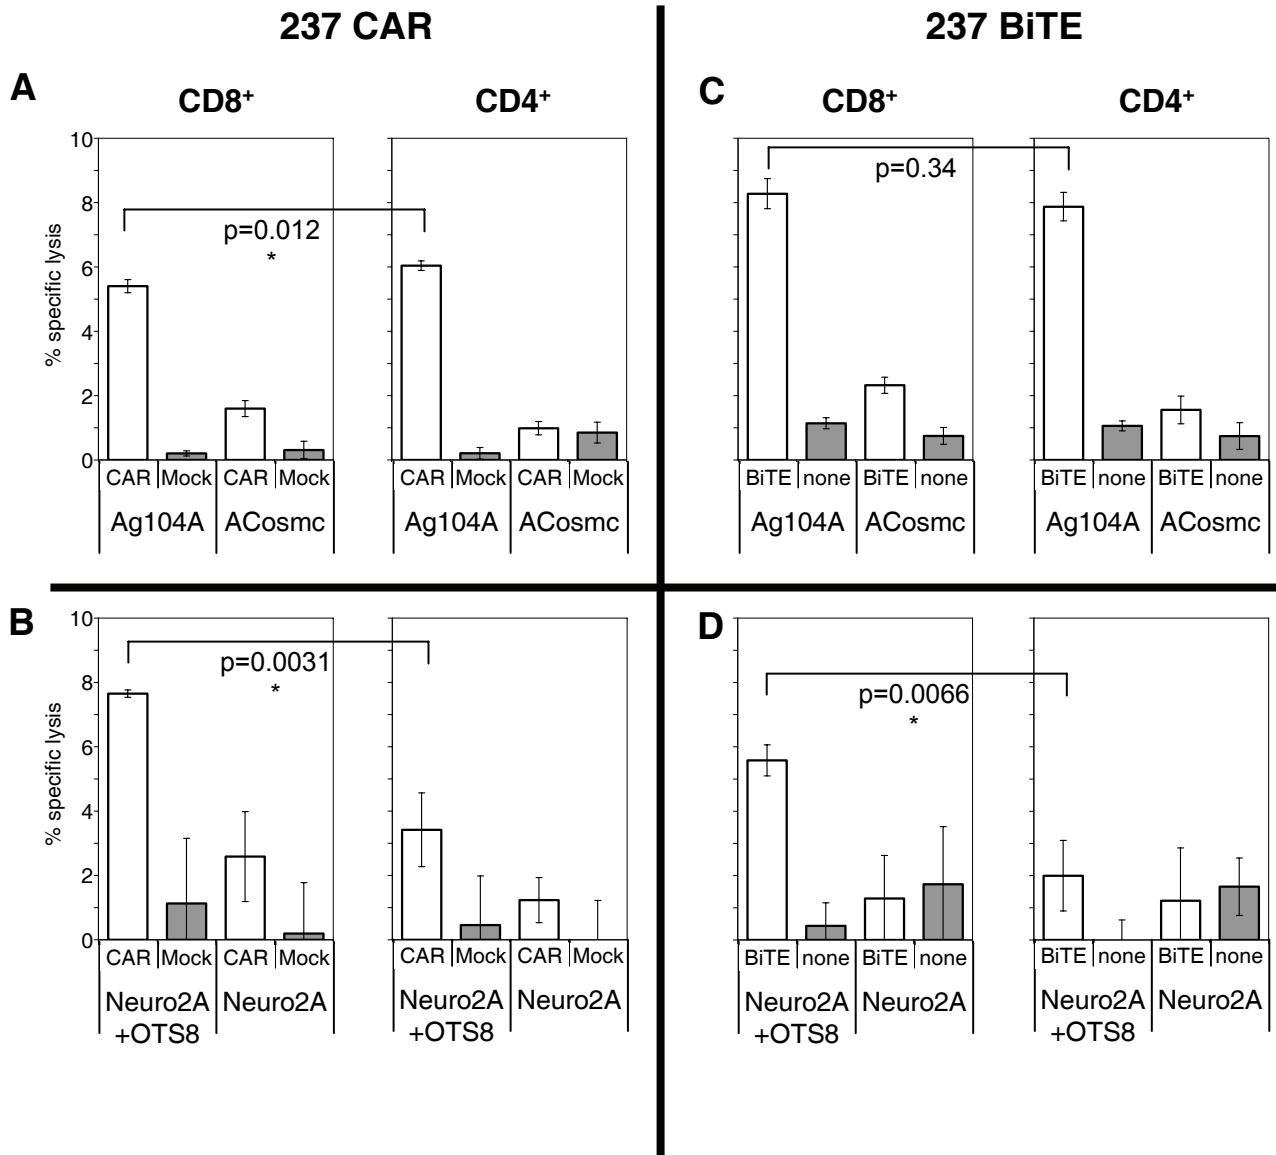

**Supplementary Figure 2. Target Cell Lysis Stimulated By 237 Targeting Strategies.** Lysis of murine target cells by (A,B) 237 CAR- or Mock-transduced T cells, or (C,D) T cells with or without 100nM added 2C11:237 BiTE; where the specific target cells are (A,C) murine fibrosarcoma cells Ag104A ( $237^{\text{high}}$ , open bars) or ACosmc ( $237^{\text{low}}$ , shaded bars); (B,D) murine neuroblastoma cells Neuro2A+OTS8 ( $237^{\text{high}}$ , open bars) or Neuro2A ( $237^{\text{low}}$ , shaded bars). In each panel, the responses of CD8+ T cells are shown in the left graph, and the responses of CD4+ T cells are shown in the right graph. Lysis was measured by  $^{51}\text{Cr}$  release into the culture medium. The Students' unpaired, two-tailed t test was used to calculate p values indicating the difference between CD8+ and CD4+ responses.
